# Supplementary material for: Construction and Integration of Three De Novo Japanese Human Genome Assemblies toward a Population-Specific Reference
Source: bioRxiv or medRxiv preprint supplement (doi:10.1101/861658), 2019-12-02
Supplement: Supplementary file [file media-1.pdf]

894 **SUPPLEMENTARY FIGURE LEGENDS**

895 **Supplementary Fig. 1.** Karyotypes of the three subjects: **(a)** jg1a, **(b)** jg1b, and **(c)** jg1c.

896 The arrow in panel **(a)** indicates the normal variation inv(9)(p12q13).

897

898 **Supplementary Fig. 2.** Harr plot of the alignment between chromosome 9 of GRCh38

899 and two largest scaffolds aligned to chromosome 9 from the **(a)** jg1a, **(b)** jg1b, and **(c)**

900 jg1c assemblies, indicating that the two individual genomes harbor a possible shared

901 inversion. 'Super-scaffold' is the default prefix designated by BionanoSolve software.

902

903 **Supplementary Fig. 3.** Workflow of the construction of JG1. **(a)** Workflow of the

904 construction of each draft assembly. **(b)** Workflow of the integration of three draft

905 assemblies. Rectangles indicate substrates such as reads, contigs, and scaffolds.

906 Rectangles with rounded corners indicate software or processes.

907

908 **Supplementary Fig. 4:** Histogram of PacBio subreads length for **(a)** jg1a, **(b)** jg1b, and

909 **(c)** jg1c. The length of each subread was calculated using the SAMtools (ver. 1.8) faidx

910 command.

911

912 **Supplementary Fig. 5:** Histogram of Bionano data for **(a)** Nt.BspQI of jg1a, **(b)**

913 Nb.BssSI of jg1a, **(c)** jg1b, and **(d)** jg1c. The length of each molecule was extracted from

914 the BNX file.

915

916 **Supplementary Fig. 6:** Majority decision. **(a)** Schematic representation of majority

917 decision approach. **(b)** Venn diagram of SNVs detected in JG1, jg1a, jg1b, and jg1c by

918 comparison with hs37d5. The intersection relationship was inferred using the BCFtools

919 (ver. 1.8) isec command.

920

921 **Supplementary Fig. 7:** Length distributions of detected transposable elements in the  
922 GRCh38 and JG1 genomes. Shown are *Alu*, SVA, and LINE1. Transposable elements and  
923 their subclasses were identified using RepeatMasker software (ver. 4.0.7) with the '-  
924 species human' option. The resulting OUT format files were converted to BED format  
925 using the `rmsk2bed` command of BEDOPS software<sup>59</sup> (ver. 2.4.35). Transposable  
926 elements disrupted by other elements were counted as distinct.  
927

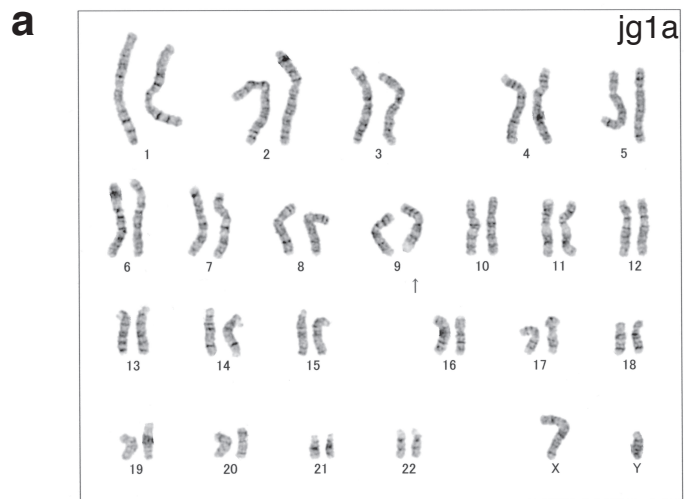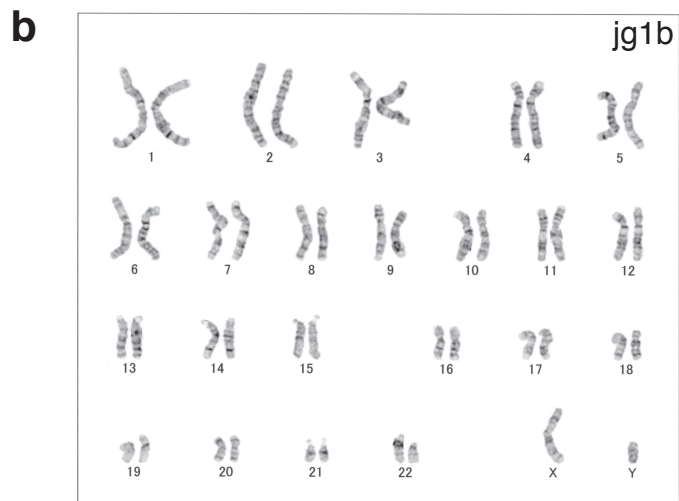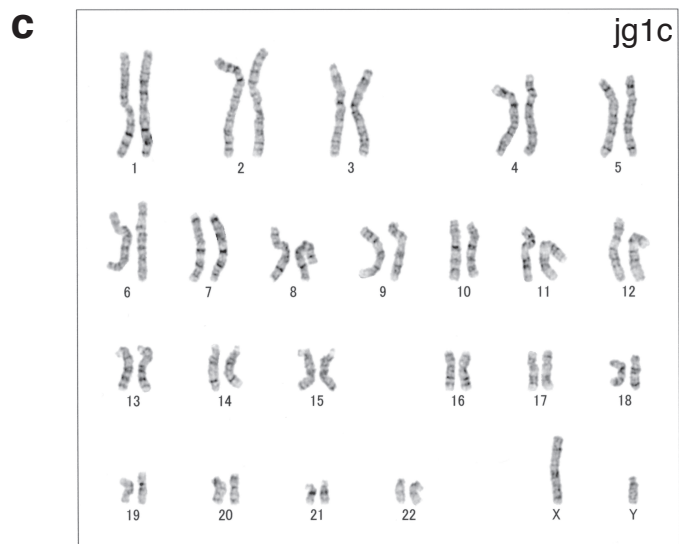

Supplementary Fig. 1; Takayama et al.

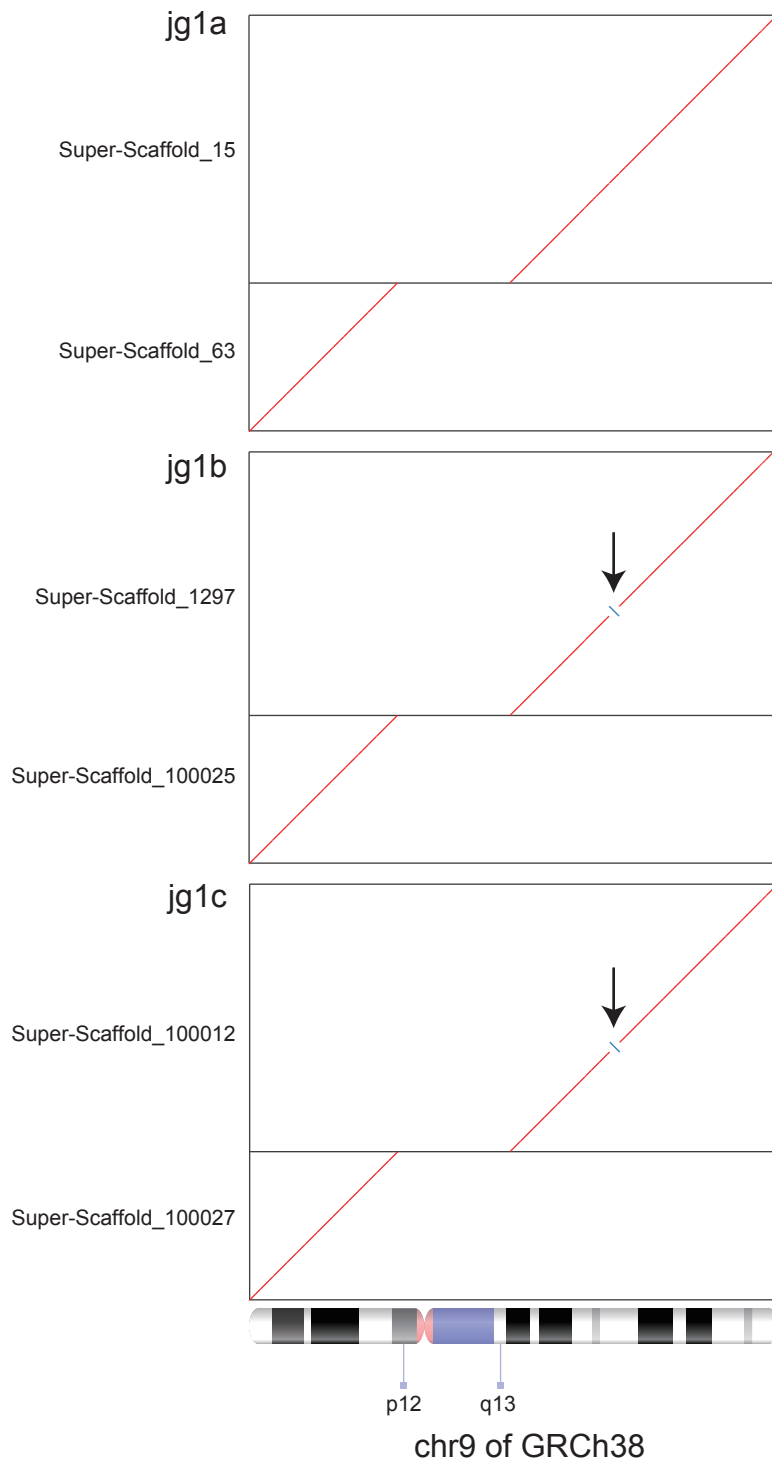

Supplementary Fig. 2  
Takayama et al.



**a**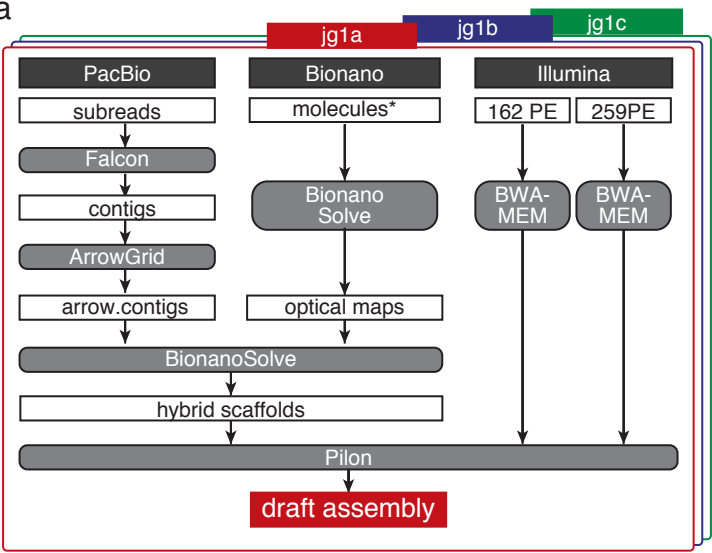

\*: Two enzymes (BspQI & BssSI) for jg1a; one enzyme (DEL-1) for jg1b and jg1c

**b**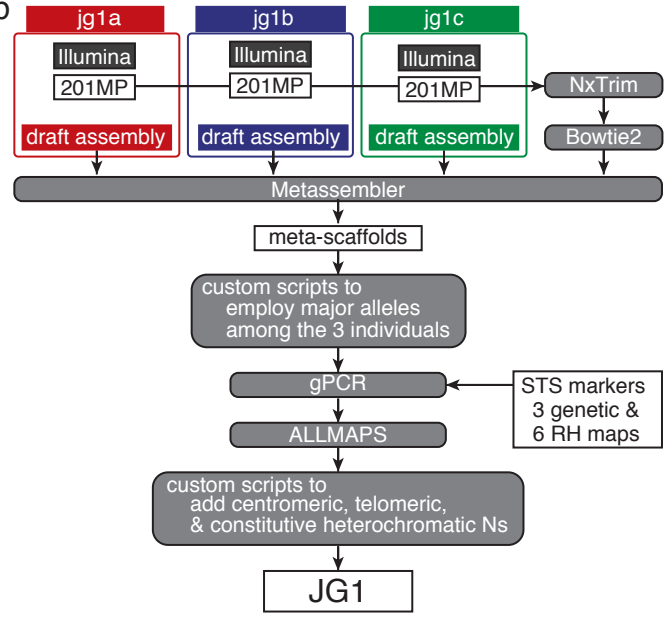

Supplementary Fig. 3; Takayama et al

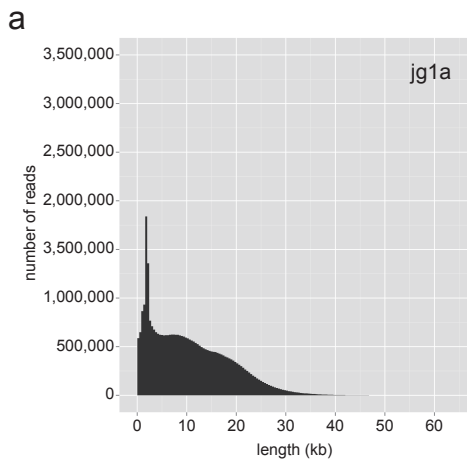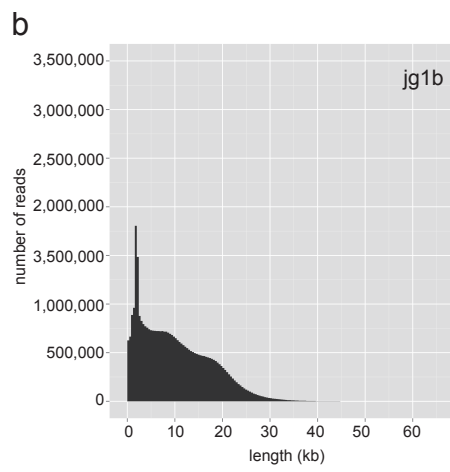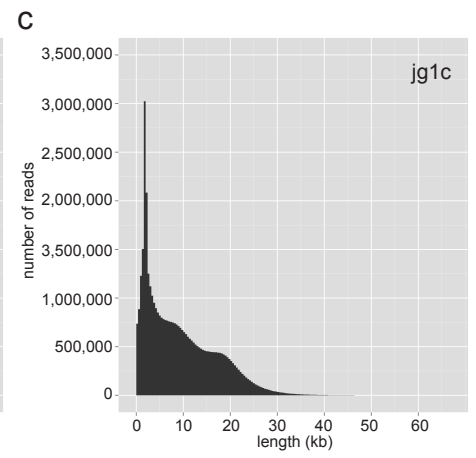

Supplementary Fig. 4  
Takayama et al.

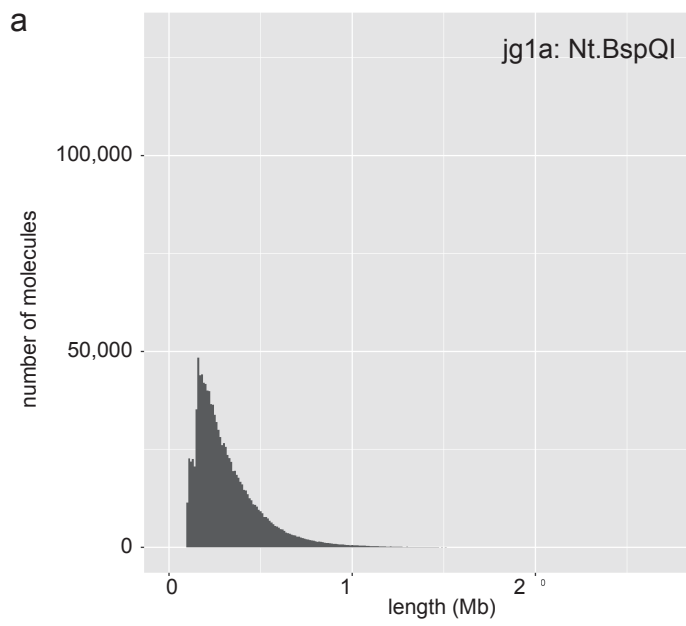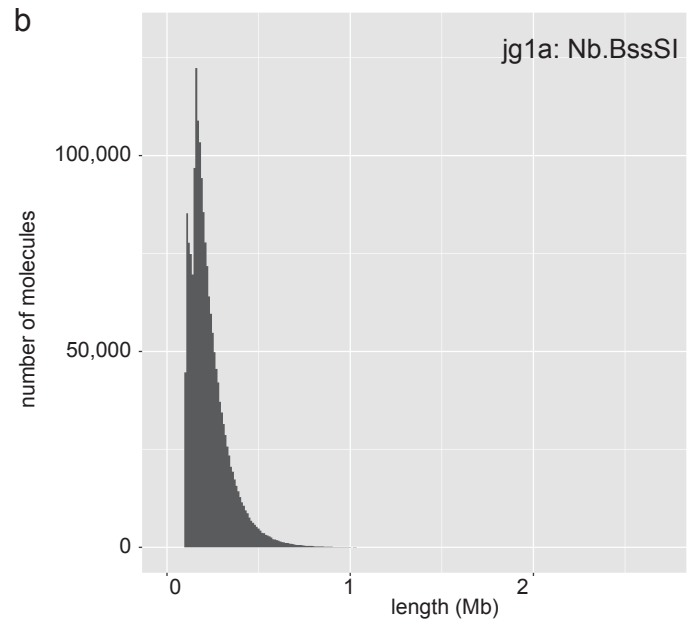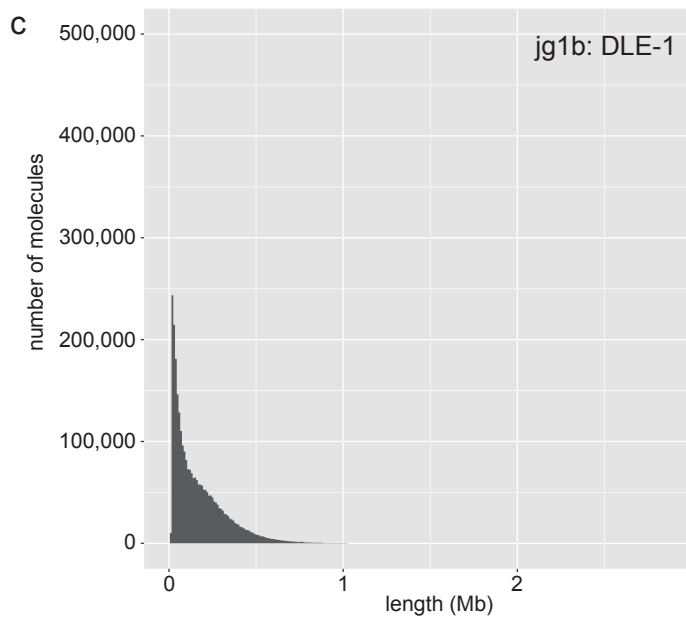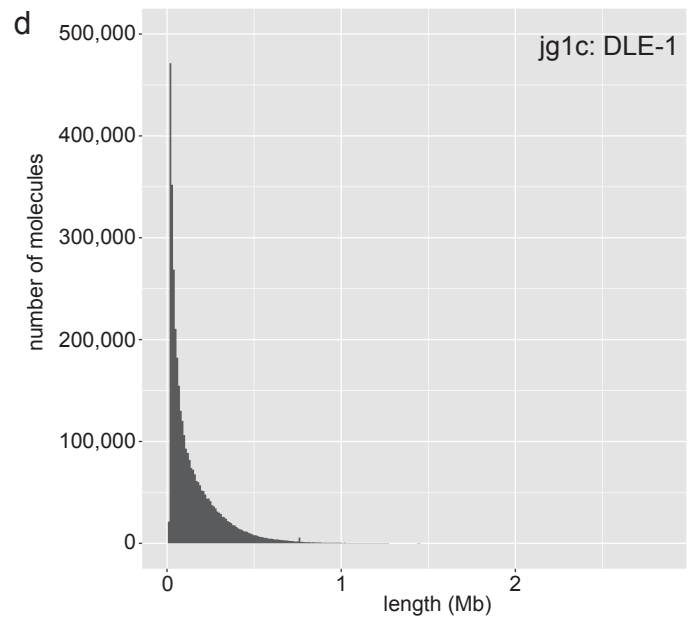

Supplementary Fig. 5  
Takayama et al.

**a**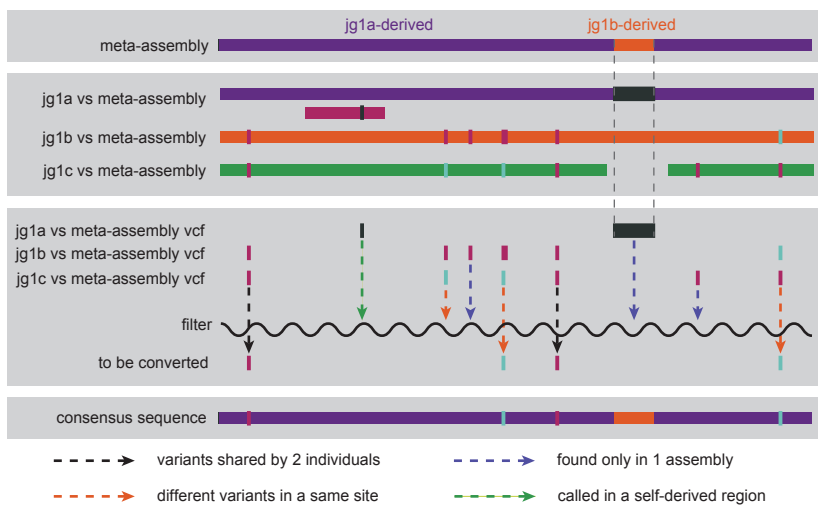**b**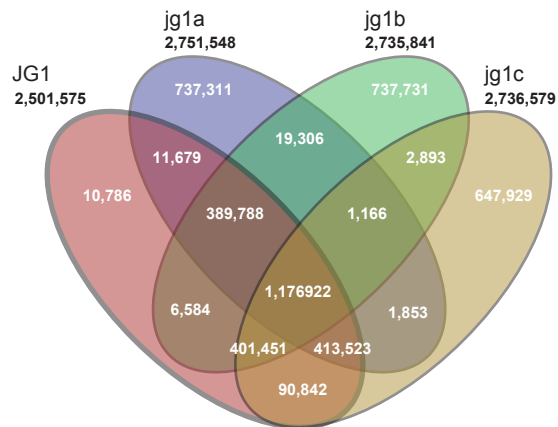

Supplementary Fig. 6  
Takayama et al.

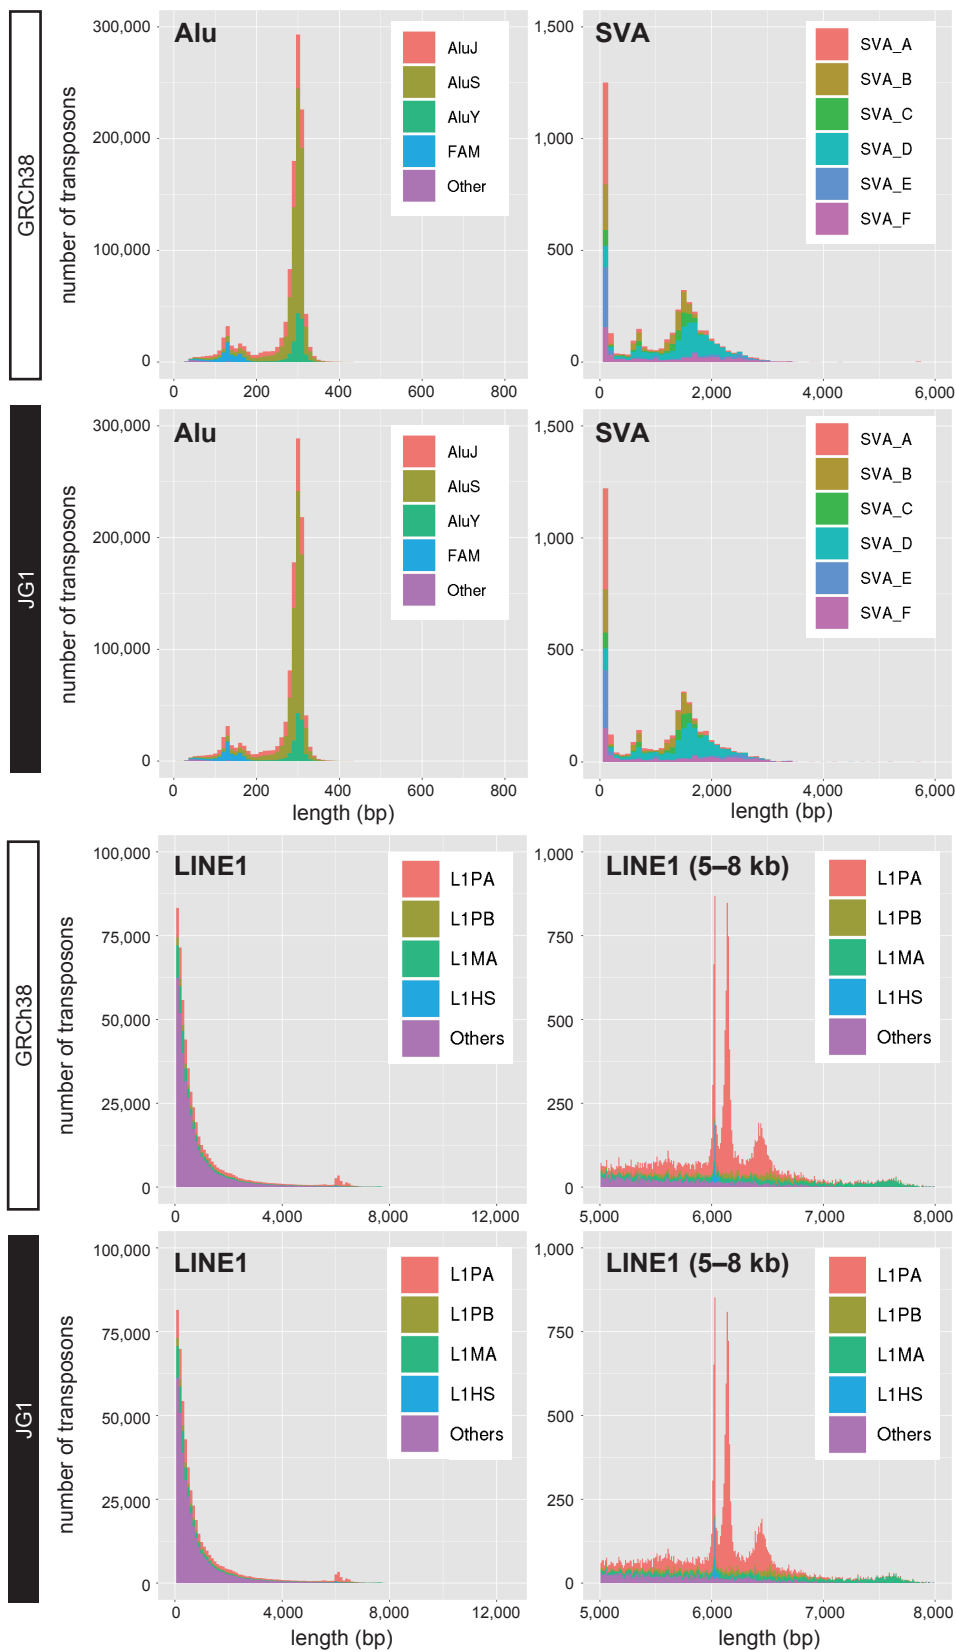

Supplementary Fig. 7  
Takayama et al.

**Supplementary Table 1.** Basic statistics of PacBio subreads.

| Individual  | Number of subreads | Sum of subread length (bp) | depth* |
|-------------|--------------------|----------------------------|--------|
| <b>hg1a</b> | 34,445,474         | 364,777,563,591            | 122X   |
| <b>hg1b</b> | 36,798,731         | 370,437,373,175            | 123X   |
| <b>hg1c</b> | 41,535,337         | 383,220,406,482            | 128X   |

\* Depth is calculated by assuming the genome size = 3.0 Gb.

**Supplementary Table 2.** Basic statistics of Bionano molecules.

| Individual  | Enzyme | Number of molecules | Sum of molecule length (bp) | depth* |
|-------------|--------|---------------------|-----------------------------|--------|
| <b>hg1a</b> | BspQI  | 1,156,682           | 368,075,072,000             | 123X   |
|             | BssSI  | 1,834,771           | 418,513,858,000             | 140X   |
| <b>hg1b</b> | DLE-1  | 2,840,733           | 480,476,071,000             | 160X   |
| <b>hg1c</b> | DLE-1  | 3,594,225           | 524,851,027,000             | 175X   |

\* Depth is calculated by assuming the genome size = 3.0 Gb.

**Supplementary Table 3.** Basic statistics of Illumina paired-end and mate-pair reads.

| Method             | Individual | read length (bp) | # of reads  | Sum of read length (bp) | depth* |
|--------------------|------------|------------------|-------------|-------------------------|--------|
| <b>paired end</b>  | hg1a       | 162              | 543,599,992 | 88,063,198,704          | 29X    |
|                    |            | 259              | 303,625,608 | 78,639,032,472          | 26X    |
|                    | hg1b       | 162              | 578,161,124 | 93,662,102,088          | 31X    |
|                    |            | 259              | 319,177,020 | 82,666,848,180          | 28X    |
|                    | hg1c       | 162              | 571,414,220 | 92,569,103,640          | 31X    |
|                    |            | 259              | 302,332,088 | 78,304,010,792          | 26X    |
| <b>mate pair**</b> | hg1a       | 201              | 189,189,310 | 38,027,051,310          | 13X    |
|                    | hg1b       |                  | 184,346,446 | 37,053,635,646          | 12X    |
|                    | hg1c       |                  | 185,928,504 | 37,371,629,304          | 12X    |

\* Depth is calculated by assuming the genome size = 3.0 Gb.

\*\*all reads (before library separation)

**Supplementary Table 4.** Basic statistics of Bionano assembly.

| <b>Individual</b> | <b>Enzyme</b> | <b># of fragments</b> | <b>N50 (Mb)</b> | <b>Total length (Mb)</b> |
|-------------------|---------------|-----------------------|-----------------|--------------------------|
| <b>cg1a</b>       | BspQI         | 4,761                 | 1.179           | 3846.912                 |
| <b>cg1a</b>       | BssSI         | 4,392                 | 1.034           | 3202.036                 |
| <b>cg1b</b>       | DLE-1         | 581                   | 41.761          | 3194.487                 |
| <b>cg1c</b>       | DLE-1         | 496                   | 64.293          | 3481.086                 |

**Supplementary Table 5.** Length of consecutive Ns inserted manually.

| <b>chr</b> | <b>pter (bp)</b> | <b>cen (bp)</b> | <b>qter (bp)</b> | <b>References</b> |
|------------|------------------|-----------------|------------------|-------------------|
| <b>1</b>   | 10,000           | 30,000,000      | 10,000           | 48–50             |
| <b>2</b>   | 10,000           | 3,000,000       | 10,000           |                   |
| <b>3</b>   | 10,000           | 3,000,000       | 10,000           |                   |
| <b>4</b>   | 10,000           | 3,000,000       | 10,000           |                   |
| <b>5</b>   | 10,000           | 3,000,000       | 10,000           |                   |
| <b>6</b>   | 10,000           | 3,000,000       | 10,000           |                   |
| <b>7</b>   | 10,000           | 3,000,000       | 10,000           |                   |
| <b>8</b>   | 10,000           | -               | 10,000           |                   |
| <b>9</b>   | 10,000           | 30,000,000      | 10,000           | 48–50             |
| <b>10</b>  | 10,000           | 3,000,000       | 10,000           |                   |
| <b>11</b>  | 10,000           | -               | 10,000           |                   |
| <b>12</b>  | 10,000           | 3,000,000       | 10,000           |                   |
| <b>13</b>  | 16,000,000       | -               | 10,000           | 50                |
| <b>14</b>  | 16,000,000       | -               | 10,000           | 50                |
| <b>15</b>  | 17,000,000       | -               | 10,000           | 50                |
| <b>16</b>  | 10,000           | 20,000,000      | 10,000           | 48–50             |
| <b>17</b>  | 10,000           | 3,000,000       | 10,000           |                   |
| <b>18</b>  | 10,000           | 3,000,000       | 10,000           |                   |
| <b>19</b>  | 10,000           | 3,000,000       | 10,000           |                   |
| <b>20</b>  | 10,000           | 3,000,000       | 10,000           |                   |
| <b>21</b>  | 11,000,000       | -               | 10,000           |                   |
| <b>22</b>  | 13,000,000       | -               | 10,000           |                   |
| <b>X</b>   | 10,000           | 3,000,000       | 10,000           |                   |
| <b>Y</b>   | 2,260,577        | 3,000,000       | 30,000,000       | 48, 51–53         |
